# Supplementary material for: Patterns of Genome-Wide Variation in Glossina fuscipes fuscipes Tsetse Flies from Uganda
Source: PubMed Central journal article supplement (PMC4889654; doi:10.1534/g3.116.027235), 2016-03-26
Supplement: supp_g3.116.027235_FigureS2.pdf [file supp_g3.116.027235_FigureS2.pdf]

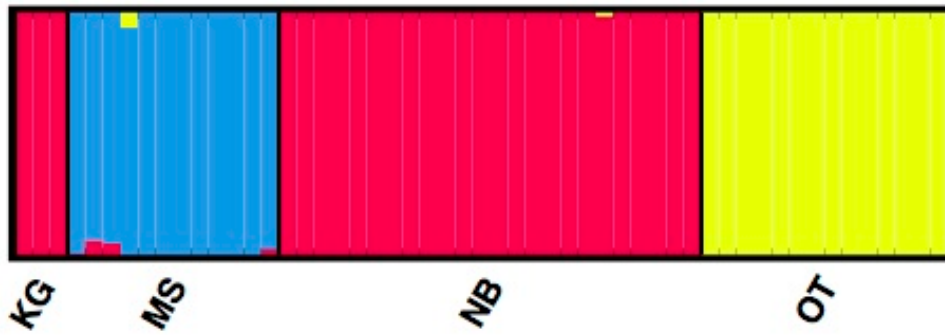

**Figure S2:** Genetic membership bar plot based on 73, 297 SNPs obtained using fastStructure (Raj et al. 2014). Each vertical bar represents a single individual. The height of each color represents the probability of assignment to each of  $K=3$  clusters for all sampled flies in all populations ( $N=53$ ). KG: Kalangala; MS: Masindi; OT: Otuboi; NB: Namutumba.
